# Supplementary material
Source: publisher site journal article supplement (https://www.spandidos-publications.com/3884/downloadSupplementary)

Figure S1. Kaplan-Meier curves for overall survival in the lenvatinib, sorafenib and TACE groups. TACE, transarterial chemoembolization.

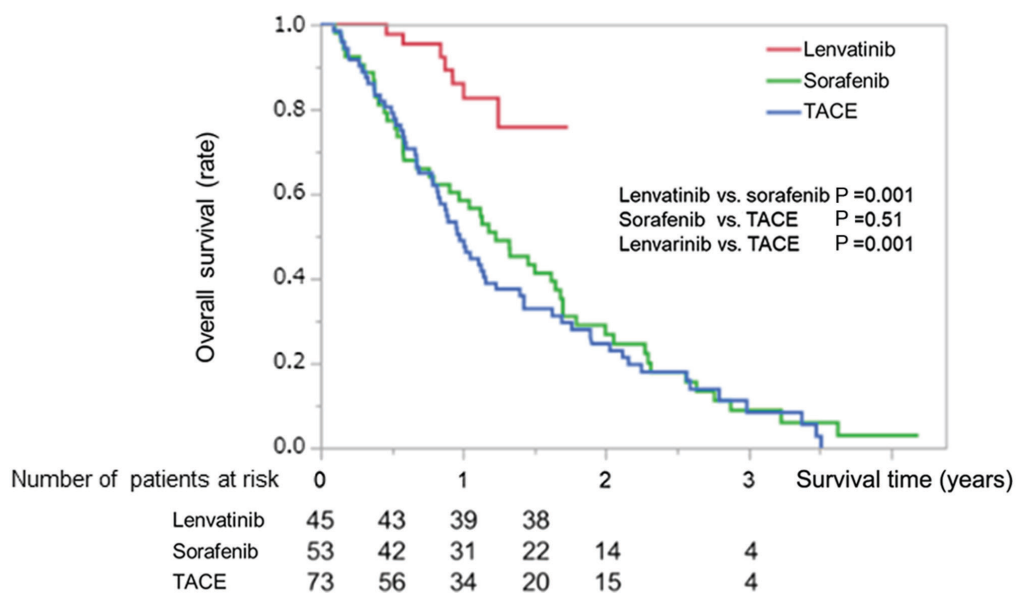

Figure S2. Kaplan-Meier curves for the medication period with lenvatinib in the ALBI grade 1 and 2 groups. ALBI, albumin-bilirubin.

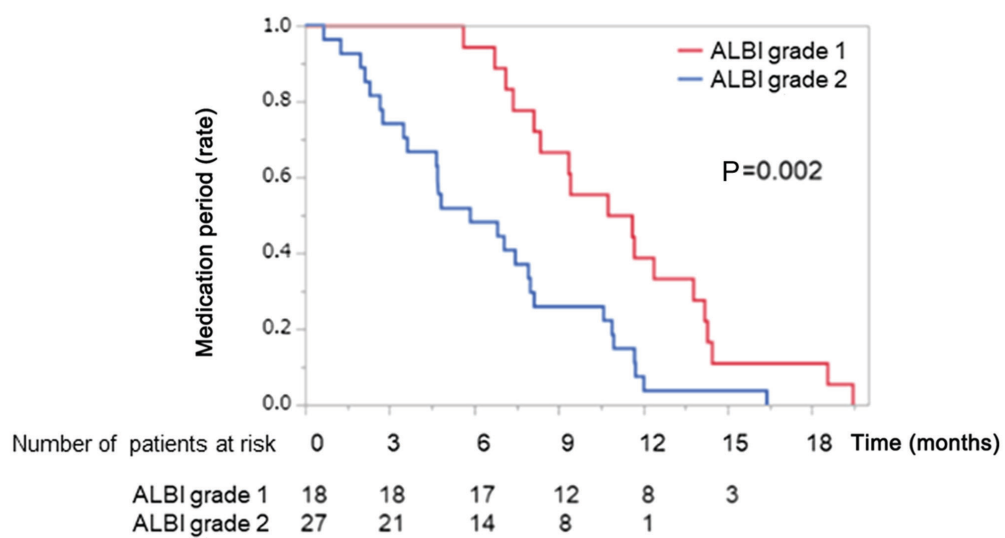

Supplement: Supplementary file 1 [file downloadSupplementary]
